# Supplementary material for: Catalytic removal of 1,2-dichloroethane over LaSrMnCoO6/H-ZSM-5 composite: insights into synergistic effect and pollutant-destruction mechanism
Source: Royal Society of Chemistry journal article supplement (doi:10.1039/c8cy00950c), 2018-01-01
Supplement: c8cy00950c1.pdf [file c8cy00950c1.pdf]

## Supplementary Material

### **Catalytic removal of 1,2-dichloroethane over LaSrMnCoO<sub>6</sub>/H-ZSM-5 composite: Insights into synergistic effect and pollutant destruction mechanism**

Mingjiao Tian<sup>1</sup>, Mudi Ma<sup>1</sup>, Bitao Xu<sup>1</sup>, Changwei Chen<sup>1</sup>, Chi He<sup>1,2,\*</sup>, Zhengping Hao<sup>3</sup>, Reem Albilali<sup>4</sup>

*<sup>1</sup>Department of Environmental Science and Engineering, State Key Laboratory of Multiphase Flow in Power Engineering, School of Energy and Power Engineering, Xi'an Jiaotong University, Xi'an 710049, Shaanxi, P.R. China*

*<sup>2</sup>Cardiff Catalysis Institute, School of Chemistry, Cardiff University, Main Building, Park Place, Cardiff, CF10 3AT, UK*

*<sup>3</sup>National Engineering Laboratory for VOCs Pollution Control Material & Technology, University of Chinese Academy of Sciences, Beijing 101408, P.R. China*

*<sup>4</sup>Department of Chemistry, College of Science, Imam Abdulrahman Bin Faisal University, P.O. Box 1982, Dammam 31441, Saudi Arabia*

\*To whom correspondence should be addressed:

Tel./Fax: +86 29 82663857; E-mail: chi\_he@xjtu.edu.cn

**Table S1** Physicochemical properties and catalytic performance of synthesized catalysts

| Samples                                                | $S_{\text{BET}}^{\text{a}}$ (m <sup>2</sup> /g) | $D_{\text{v}}^{\text{b}}$ (cm <sup>3</sup> /g) | $D_{\text{p}}^{\text{c}}$ (nm) | $T_{50}^{\text{d}}$ (°C) | $T_{90}^{\text{d}}$ (°C) | $S_{\text{CO}_2}^{\text{f}}$ (%) | $S_{\text{CO}}^{\text{f}}$ (%) | $S_{\text{HCl}}^{\text{f}}$ (%) | $S_{\text{Cl}_2}^{\text{f}}$ (%) | $C_{\text{B}}^{\text{g}}$ (%) |
|--------------------------------------------------------|-------------------------------------------------|------------------------------------------------|--------------------------------|--------------------------|--------------------------|----------------------------------|--------------------------------|---------------------------------|----------------------------------|-------------------------------|
| La <sub>2</sub> MnCoO <sub>6</sub>                     | 9.97                                            | 0.19                                           | 83.2                           | 435                      | 528                      | 79.2                             | 21.0                           | 29.4                            | 67.3                             | 100.2                         |
| La <sub>1.5</sub> Sr <sub>0.5</sub> MnCoO <sub>6</sub> | 6.80                                            | 0.12                                           | 53.8                           | 449                      | 535                      | 66.1                             | 32.4                           | 32.2                            | 66.7                             | 98.5                          |
| LaSrMnCoO <sub>6</sub>                                 | 11.00                                           | 0.12                                           | 53.6                           | 415                      | 509                      | 89.2                             | 11.7                           | 40.0                            | 60.3                             | 100.9                         |
| La <sub>0.5</sub> Sr <sub>1.5</sub> MnCoO <sub>6</sub> | 8.06                                            | 0.10                                           | 36.2                           | 466                      | 540                      | 68.2                             | 32.0                           | 30.3                            | 69.1                             | 100.2                         |

<sup>a</sup> BET surface area calculated at  $P/P_0 = 0.05-0.25$ ; <sup>b</sup> Total pore volume estimated at  $P/P_0 = 0.99$ ; <sup>c</sup> BJH pore diameter calculated from the absorption branch; <sup>d</sup> Temperatures at which 50% and 90% conversion of 1,2-DCE; <sup>f</sup> Selectivity of CO<sub>2</sub>, CO, HCl, and Cl<sub>2</sub> over synthesized materials at 580 °C; <sup>g</sup> Carbon balance of prepared materials at 580 °C.

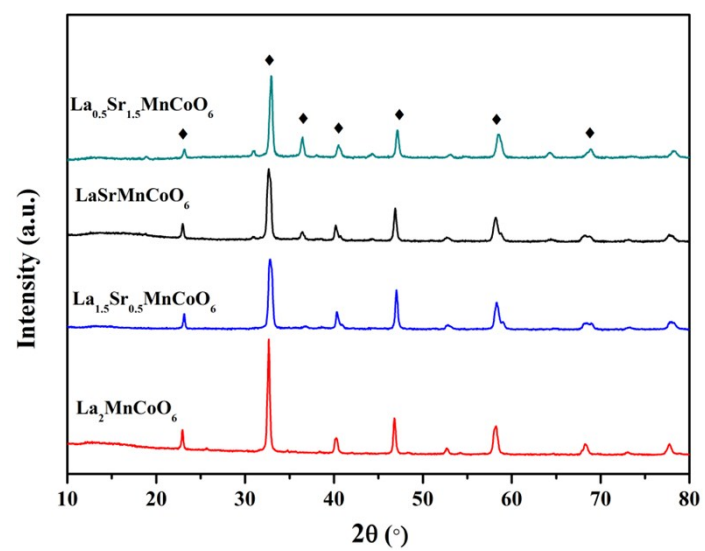

Fig. S1 XRD of the synthesized c materials.

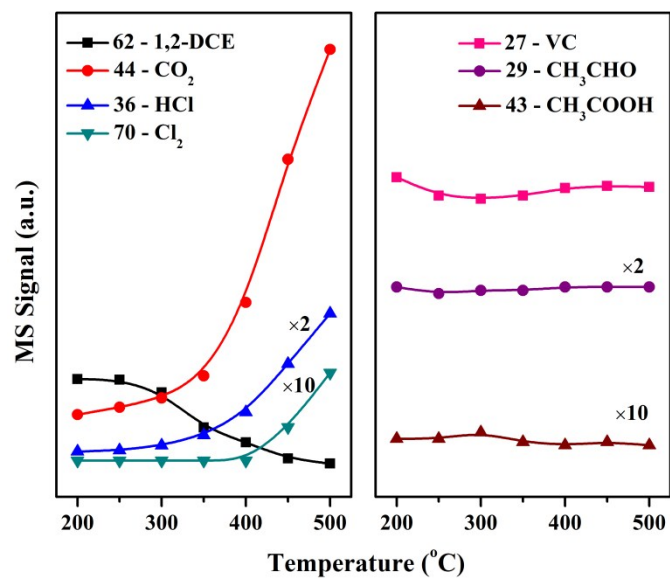

Fig. S2 MS signal of 0.1LSMC/Z sample.

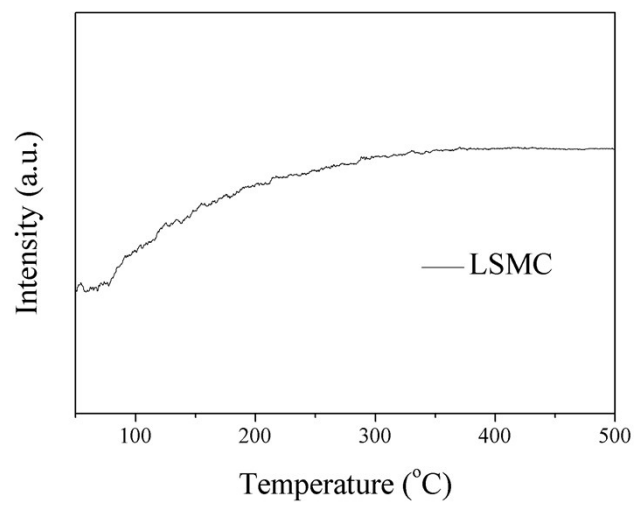

**Fig. S3** 1,2-dichloroethane adsorption capacity of LSMC.
